# Supplementary material
Source: Research Square preprint supplement (doi:10.21203/rs.3.rs-9545172/v1)
Supplement: Supplementary file 1 [file 5d8b54ea352e0e726a728000.xlsx]

## Sheet: Sheet1
Supplementary File 2
Questionnaire Survey Form Regarding Antimicrobial Resistance (Milk Vendors – Zaria, Nigeria)
Note: This questionnaire was administered under ethical approval ABUCUHSR/2022/29
We are carrying out a study on milk safety and antimicrobial resistance in Zaria, Nigeria. This questionnaire is part of the research and has been approved by the ethics committee (ABUCUHSR/2022/29).
The purpose is to understand your knowledge, attitudes, and practices about antibiotics and antimicrobial resistance in milk and dairy products. Your answers will help researchers and health experts improve food safety and protect public health.
Participation is voluntary, and your responses will remain confidential. There are no right or wrong answers — we only ask that you respond honestly. Written consent has been obtained, and all information will be used only for academic and public health research.
Section A: General Information
Item code	Questionnaire item	Response option	Frequency	Percent
A1	Name of village/settlement	Bassawa	17	22.1
A1	Name of village/settlement	Hunkuyi	12	15.6
A1	Name of village/settlement	Giwa	10	13
A1	Name of village/settlement	Kudingi	6	7.8
A1	Name of village/settlement	Others	32	41.6
A2	Type of respondent	Hawker	77	100
A3	Main animal species from which milk/products are obtained	No response	5	6.5
A3	Main animal species from which milk/products are obtained	Cattle	60	77.9
A3	Main animal species from which milk/products are obtained	Goat	4	5.2
A3	Main animal species from which milk/products are obtained	Sheep	3	3.9
A3	Main animal species from which milk/products are obtained	Camel	5	6.5
A4	How many different sources do you usually obtain milk from?	No response	8	10.4
A4	How many different sources do you usually obtain milk from?	1 source	36	46.8
A4	How many different sources do you usually obtain milk from?	2 sources	14	18.2
A4	How many different sources do you usually obtain milk from?	3 sources	6	7.8
A4	How many different sources do you usually obtain milk from?	Many / more than 3	13	16.9
A5	Participated in structured training on antibiotic use/resistance	No response	2	2.6
A5	Participated in structured training on antibiotic use/resistance	Yes	43	55.8
A5	Participated in structured training on antibiotic use/resistance	No	32	41.6
Section B: Knowledge Regarding Antimicrobial Resistance
Item code	Questionnaire item	Response option	Frequency	Percent
B1	Have you ever heard of the term “antimicrobial resistance”?	No response	18	23.4
B1		Yes	39	50.6
B1		No	20	26
B2	In your understanding, what does antimicrobial resistance mean?	No response	15	19.5
B2		It leads to treatment failure	16	20.8
B2		It leads to poor/weak response to treatment	6	7.8
B2		Both (a) and (b)	13	16.9
B2		I do not know	26	33.8
B2		Others	1	1.3
B3	In your opinion, can antibiotic residues in milk or meat contribute to the development of antimicrobial resistance?	No response	17	22.1
B3		Yes	43	55.8
B3		No	17	22.1
B4	Are you aware of any recommendations from the National AMR Action Plan for Nigeria?	No response	15	19.5
B4		Yes	32	41.6
B4		No	30	39
B5	“In Nigeria, most milk is tested before consumption to check for safety problems, including antibiotic residues.”	True (correct)	34	44.2
B5		False (incorrect)	38	49.4
B5		Do not know	5	6.5
Section C: Attitudes towards Antimicrobial Resistance
Item code	Revised attitude statement	SA n (%)	A n (%)	SWA n (%)	N n (%)	SWD n (%)	D n (%)	SD n (%)	Mean*
C1	There are sufficient new antibiotics being developed to keep pace with resistance	4 (5.2)	18 (23.4)	4 (5.2)	7 (9.1)	15 (19.5)	7 (9.1)	22 (28.6)	3.43
C2	Healthy people and apparently healthy animals can still carry antibiotic‑resistant bacteria	7 (9.1)	24 (31.2)	15 (19.5)	15 (19.5)	2 (2.6)	0 (0.0)	14 (18.2)	4.5
C3	I am concerned that I or someone in my household could acquire an infection caused by resistant bacteria	7 (9.1)	17 (22.1)	9 (11.7)	22 (28.6)	4 (5.2)	0 (0.0)	18 (23.4)	4.07
C4	Skipping one or two doses of an antibiotic course can contribute to AMR	15 (19.5)	28 (36.4)	4 (5.2)	11 (14.3)	2 (2.6)	6 (7.8)	11 (14.3)	4.67
C5	When visiting a dairy farm, there is a high likelihood of exposure to resistant bacteria	6 (7.8)	15 (19.5)	4 (5.2)	9 (11.7)	5 (6.5)	7 (9.1)	31 (40.3)	3.17
C6	When visiting a hospital or health facility, there is a high likelihood of exposure to resistant bacteria	7 (9.1)	13 (16.9)	4 (5.2)	13 (16.9)	11 (14.3)	18 (23.4)	11 (14.3)	3.62
C7	Testing milk before sale is important to protect consumers from problems related to resistant bacteria¹	15 (19.5)	13 (16.9)	10 (13.0)	5 (6.5)	10 (13.0)	6 (7.8)	18 (23.4)	4.07
									3.93
Section D: Practices Relevant to Antimicrobial Resistance
Perfect, Muhammad — now we can finalize Section D by converting those Likert-style items (C5 and C6) into the frequency-style categories you expected. Here’s the complete corrected table for hawkers (n = 77):
Section D: Practices Relevant to Antimicrobial Resistance
Item code	Questionnaire item	Response option	Frequency	Percent
D1	Visiting a dairy farm presents a substantial risk of exposure to antimicrobial‑resistant bacterial strains.	Never	38	0.494
D1	…	Occasionally (a few times per year)	14	0.182
D1	…	About once a month	4	0.052
D1	…	About once a week	15	0.195
D1	…	Almost every day	6	0.078
D2	Attending a hospital or other healthcare facility carries a considerable risk of encountering antimicrobial-resistant microorganisms.	Never	29	0.377
D2	…	Occasionally (a few times per year)	24	0.312
D2	…	About once a month	4	0.052
D2	…	About once a week	13	0.169
D2	…	Almost every day	7	0.091
D3	Have you ever received advice or counseling from any health professional regarding AMR?	No response	2	0.026
D3	…	Yes	43	0.558
D3	…	No	32	0.416
D4	If yes, from whom did you receive this advice?	No Response	77	1
D5	Have concerns about AMR led you to change antibiotic use in animals or in your household?	No response	10	0.13
D5	…	Yes	49	0.636
D5	…	No	18	0.234
D6	If yes, which changes have you made?	No response	13	0.169
D6	…	Keep for further use	35	0.455
D6	…	Throw in the garbage	7	0.091
D6	…	Give to other farmers	17	0.221
D6	…	Bury in the ground / burn	5	0.065
D7	Can other animals enter the storeroom or milk storage area?	No response	32	0.416
D7	…	Yes	18	0.234
D7	…	No	27	0.351
Composite KAP Scoring Table
Dimension	Items included	Scoring method	Mean desirable response (%) / Mean Likert*	Dimension Score (%)
Knowledge	B1–B5	% “Yes” responses	47.5	47.5
Attitudes	C1–C7	Mean Likert (1–7 scale) = 3.93 → converted to % (3.93/7 × 100)	56.1	56.1
Practices	D1–D7	% desirable practices (safe, advised, restricted)	49.6	49.6
Composite	All KAP	Mean of three-dimension scores	—	51.1
