# Supplementary material
Source: Research Square preprint supplement (doi:10.21203/rs.3.rs-9545172/v1)
Supplement: Supplementary file 2 [file 82c126154a89f259f6df96da.pdf]

STROBE Statement—Checklist of items that should be included in reports of *cross-sectional studies*

**Manuscript Title:** Knowledge, attitudes, and practices on antimicrobial resistance among Fulani women dairy product vendors in Zaria, Nigeria: implications for One Health stewardship in informal dairy systems

**Journal:** Bulletin of the World Health Organization

**Corresponding author:** Muhammad Muhsin Fathuddin

**Date:** April 2026

|                           | Item No | Recommendation                                                                                                                                                                       | Where reported                                                                                                                     | ✓ /<br>✗ |
|---------------------------|---------|--------------------------------------------------------------------------------------------------------------------------------------------------------------------------------------|------------------------------------------------------------------------------------------------------------------------------------|----------|
| <b>Title and abstract</b> | 1       | (a) Indicate the study's design with a commonly used term in the title or the abstract                                                                                               | Abstract — "cross-sectional survey" stated in Methods, p.3                                                                         | ✓        |
|                           |         | (b) Provide in the abstract an informative and balanced summary of what was done and what was found                                                                                  | Abstract — Objective, Methods, Findings, Conclusion all present, p.3                                                               | ✓        |
| <b>Introduction</b>       |         |                                                                                                                                                                                      |                                                                                                                                    |          |
| Background/rationale      | 2       | Explain the scientific background and rationale for the investigation being reported                                                                                                 | Introduction situates AMR as a global challenge, highlights invisibility of Fulani women vendors in surveillance                   | ✓        |
| Objectives                | 3       | State specific objectives, including any prespecified hypotheses                                                                                                                     | Objective: assess AMR-related KAP among Fulani women milk vendors in Zaria, Nigeria                                                | ✓        |
| <b>Methods</b>            |         |                                                                                                                                                                                      |                                                                                                                                    |          |
| Study design              | 4       | Present key elements of study design early in the paper                                                                                                                              | Methods section describes descriptive cross-sectional design                                                                       | ✓        |
| Setting                   | 5       | Describe the setting, locations, and relevant dates, including periods of recruitment, exposure, follow-up, and data collection                                                      | Zaria dairy corridor; informal networks linking pastoral households to peri-urban consumers; fieldwork dates specified             | ✓        |
| Participants              | 6       | (a) Give the eligibility criteria, and the sources and methods of selection of participants                                                                                          | Fulani identity, female gender, age $\geq 18$ , $\geq 6$ months vending; purposive sampling of 100 approached, 77 enrolled         | ✓        |
| Variables                 | 7       | Clearly define all outcomes, exposures, predictors, potential confounders, and effect modifiers. Give diagnostic criteria, if applicable                                             | Domains: husbandry context, AMR knowledge, attitudes, practices; operationalised via structured questionnaire                      | ✓        |
| Data sources/measurement  | 8*      | For each variable of interest, give sources of data and details of methods of assessment (measurement). Describe comparability of assessment methods if there is more than one group | Structured questionnaire adapted from validated tools; translated into Hausa/Fulfulde; interviews by trained bilingual researchers | ✓        |
| Bias                      | 9       | Describe any efforts to address potential sources of bias                                                                                                                            | Anonymous coding, neutral prompts, culturally sensitive engagement                                                                 | ✓        |
| Study size                | 10      | Explain how the study size was arrived at                                                                                                                                            | 100 approached, 77 enrolled; purposive sampling consistent with LMIC AMR studies                                                   | ✓        |

|                        |     |                                                                                                                                                                                                   |                                                                                                                                                                                            |     |
|------------------------|-----|---------------------------------------------------------------------------------------------------------------------------------------------------------------------------------------------------|--------------------------------------------------------------------------------------------------------------------------------------------------------------------------------------------|-----|
| Quantitative variables | 11  | Explain how quantitative variables were handled in the analyses. If applicable, describe which groupings were chosen and why                                                                      | Composite domain scores calculated for knowledge, attitudes, practices                                                                                                                     | ✓   |
| Statistical methods    | 12  | (a) Describe all statistical methods, including those used to control for confounding                                                                                                             | Methods — Data management/analysis: descriptive statistics, frequencies, percentages; chi-square and Fisher's exact tests described; $p < 0.05$ threshold stated; Python (SciPy) used, p.9 | ✓   |
|                        |     | (b) Describe any methods used to examine subgroups and interactions                                                                                                                               | N/A — no subgroup analysis                                                                                                                                                                 | N/A |
|                        |     | (c) Explain how missing data were addressed                                                                                                                                                       | Methods — Data management: "Items with missing or unclear responses were retained as a separate category and reported accordingly." P.9                                                    | ✓   |
|                        |     | (d) If applicable, describe analytical methods taking account of sampling strategy                                                                                                                | Methods — purposive sampling acknowledged, p.10                                                                                                                                            | ✓   |
|                        |     | (e) Describe any sensitivity analyses                                                                                                                                                             | N/A — descriptive study                                                                                                                                                                    | N/A |
| <b>Results</b>         |     |                                                                                                                                                                                                   |                                                                                                                                                                                            |     |
| Participants           | 13* | (a) Report numbers of individuals at each stage of study—eg numbers potentially eligible, examined for eligibility, confirmed eligible, included in the study, completing follow-up, and analysed | Results — 77 Fulani women surveyed; all questionnaires completed, p.10                                                                                                                     | ✓   |
|                        |     | (b) Give reasons for non-participation at each stage                                                                                                                                              | Results — "All 77 vendors approached consented to participate; no questionnaires were excluded from analysis." p.10                                                                        | ✓   |
|                        |     | (c) Consider use of a flow diagram                                                                                                                                                                | N/A — no exclusions                                                                                                                                                                        | N/A |
| Descriptive data       | 14* | (a) Give characteristics of study participants (eg demographic, clinical, social) and information on exposures and potential confounders                                                          | Results — "General information and husbandry conditions": livestock housing, cleaning routines, biosecurity described, p.10                                                                | ✓   |
|                        |     | (b) Indicate number of participants with missing data for each variable of interest                                                                                                               | Results — "Missing responses were minimal and are represented within figures as separate response categories." p.10                                                                        | ✓   |
| Outcome data           | 15* | Report numbers of outcome events or summary measures                                                                                                                                              | Results — domain scores (47.5/56.1/49.6) and composite KAP score (51.1) reported                                                                                                           | ✓   |
| Main results           | 16  | (a) Give unadjusted estimates and, if applicable, confounder-adjusted estimates and their precision (eg, 95% confidence interval). Make clear                                                     | Results — all proportions and means reported descriptively, p.11-12                                                                                                                        | ✓   |

|                          |    |                                                                                                                                                                            |                                                                                                                                                              |     |
|--------------------------|----|----------------------------------------------------------------------------------------------------------------------------------------------------------------------------|--------------------------------------------------------------------------------------------------------------------------------------------------------------|-----|
|                          |    | which confounders were adjusted for and why they were included                                                                                                             |                                                                                                                                                              |     |
|                          |    | (b) Report category boundaries when continuous variables were categorized                                                                                                  | N/A                                                                                                                                                          | N/A |
|                          |    | (c) If relevant, consider translating estimates of relative risk into absolute risk for a meaningful time period                                                           | N/A                                                                                                                                                          | N/A |
| Other analyses           | 17 | Report other analyses done—e.g., analyses of subgroups and interactions, and sensitivity analyses                                                                          | Results — Chi-square analyses of education level and training received against KAP outcome categories; all non-significant ( $p > 0.05$ ) reported, p. 12-13 | ✓   |
| <b>Discussion</b>        |    |                                                                                                                                                                            |                                                                                                                                                              |     |
| Key results              | 18 | Summarise key results with reference to study objectives                                                                                                                   | Mid-range KAP profile; favourable attitudes but weak practices; blind spots in knowledge                                                                     | ✓   |
| Limitations              | 19 | Discuss limitations of the study, taking into account sources of potential bias or imprecision. Discuss both the direction and the magnitude of any potential bias         | Purposive sampling, self-report bias, cross-sectional design precludes causal inference                                                                      | ✓   |
| Interpretation           | 20 | Give a cautious overall interpretation of results considering objectives, limitations, multiplicity of analyses, results from similar studies, and other relevant evidence | Fulani women vendors are active agents; stewardship must be participatory, culturally grounded, gender-sensitive                                             | ✓   |
| Generalisability         | 21 | Discuss the generalisability (external validity) of the study results                                                                                                      | Findings transferable to comparable informal dairy contexts in LMICs                                                                                         | ✓   |
| <b>Other information</b> |    |                                                                                                                                                                            |                                                                                                                                                              |     |
| Funding                  | 22 | Give the source of funding and the role of the funders for the present study and, if applicable, for the original study on which the present article is based              | Funding statement: "No specific grant from any funding agency" declared, p.16                                                                                | ✓   |

\*Give information separately for exposed and unexposed groups.

**Note:** An Explanation and Elaboration article discusses each checklist item, provides methodological background, and presents published examples of transparent reporting. The STROBE checklist is best used in conjunction with this article (freely available on the websites of PLoS Medicine at <http://www.plosmedicine.org/>, Annals of Internal Medicine at <http://www.annals.org/>, and Epidemiology at <http://www.epidem.com/>). Information on the STROBE Initiative is available at [www.strobe-statement.org](http://www.strobe-statement.org).
